# Supplementary material for: Matching protein surface structural patches for high-resolution blind peptide docking
Source: PubMed Central journal article supplement — Proc Natl Acad Sci U S A. 2022 Apr 28;119(18):e2121153119. doi: 10.1073/pnas.2121153119 (PMC9170164; doi:10.1073/pnas.2121153119), 2022-04-28
Supplement: pnas.2121153119.sapp.pdf [file pnas.2121153119.sapp.pdf]

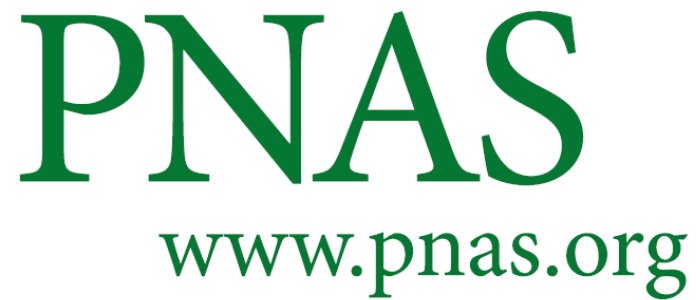

**Supplementary Information for**

Matching protein surface structural patches for high-resolution blind peptide docking

Alisa Khramushin, Ziv Ben-Aharon, Tomer Tsaban, Julia K Varga, Orly Avraham, Ora Schueler-Furman

Ora Schueler-Furman

Email: [ora.furman-schueler@mail.huji.ac.il](mailto:ora.furman-schueler@mail.huji.ac.il)

**This PDF file includes:**

Figures S1 to S5  
Tables S1 to S3  
SI References

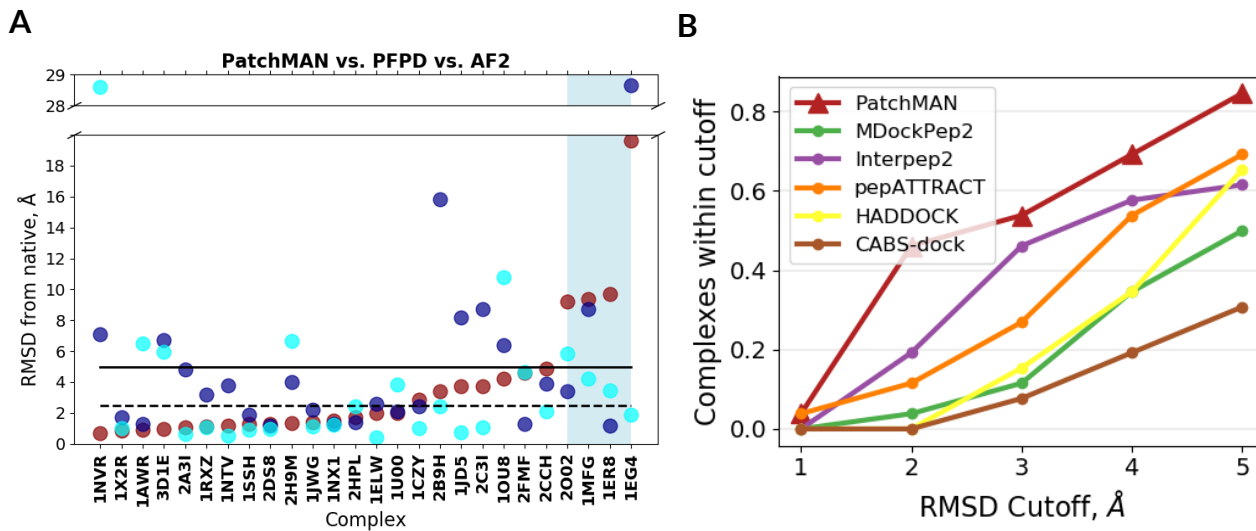

**Fig. S1, PatchMAN performance compared to other approaches**

**A.** Detailed comparison of PatchMAN (red) PFPD (blue) and AF2 (cyan) performance on the PFPD dataset. Shaded region of the plot indicates complexes for which PatchMAN failed to produce models within 5Å RMSD. **B.** PatchMAN performance on the PFPD data set shows superior performance compared to other global peptide docking approaches. For the CABS-dock and HADDOCK protocols, results are reported for a subset of 23/21 structures out of the 26 in this benchmark, respectively. Note that this plot reports ligand RMSD, L-RMSD, while the rest of the paper reports interface peptide residue backbone RMSD, rmsBB\_if.

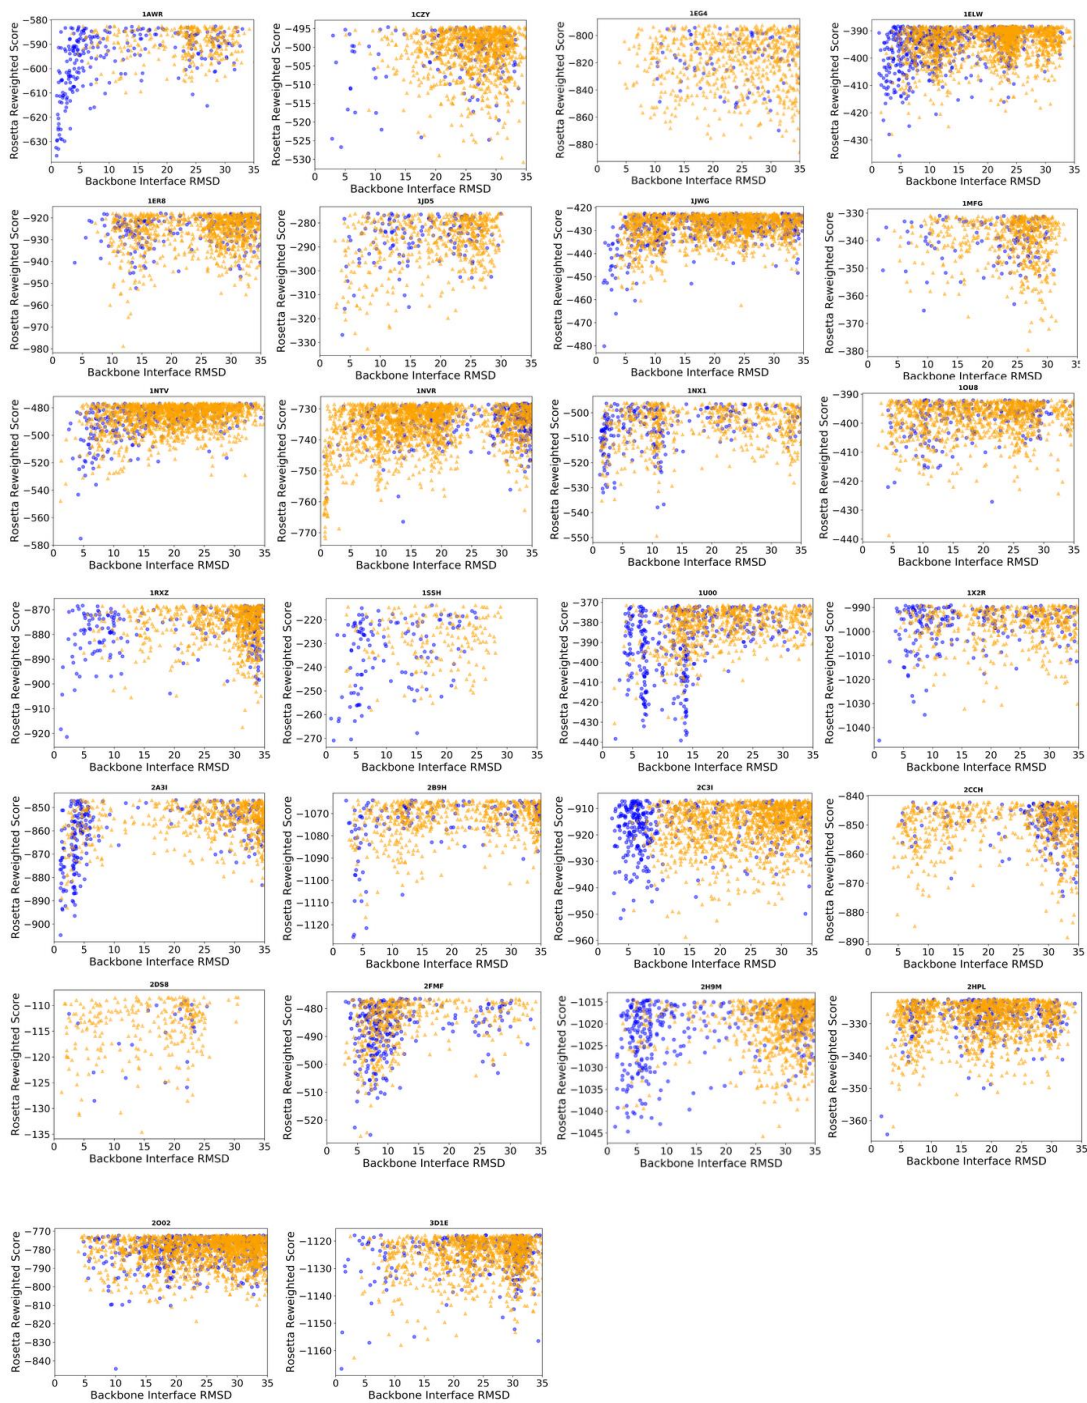

**Fig. S2. Energy landscapes**

Rosetta reweighted score vs. RMSD plots are shown for each of the complexes in the PFPD benchmark. Models generated based on templates originating from monomers are indicated in orange triangles, while those stemming from interfaces are indicated by blue circles.

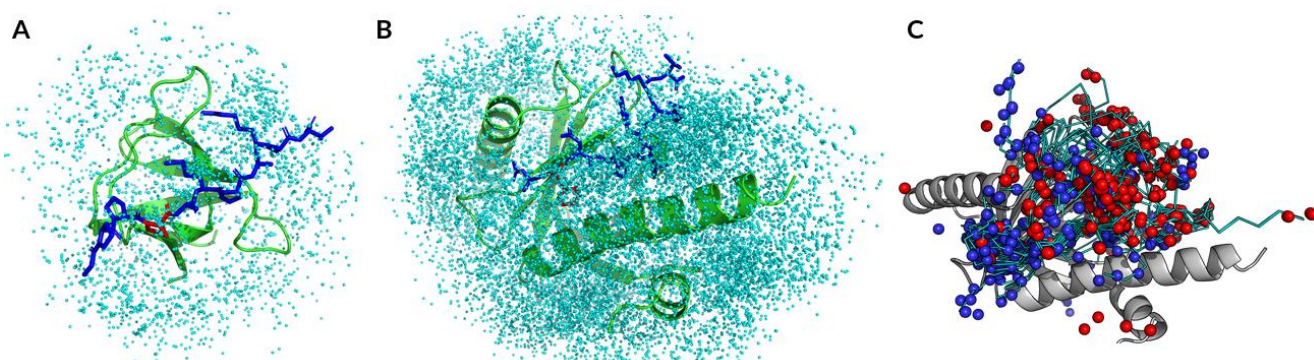

**Fig. S3. Local motif matches map the whole receptor surface**

**A-B.** Two examples showing the coverage of the receptor surface with fragments, prior to filtering: (A) 1SSH (1) and (B) 1NTV (2). The receptor and peptide are shown in green cartoon and blue stick representation, respectively. The C $\alpha$  atoms of one specified peptide residue (highlighted in red in the crystal structure) are shown in cyan spheres. **C.** Sampling at the binding site of 1NTV: Here we show the fragments sampled for a specific surface patch at the binding site. Fragments are represented by ribbons, with their N and C-termini highlighted with blue and red spheres, respectively.

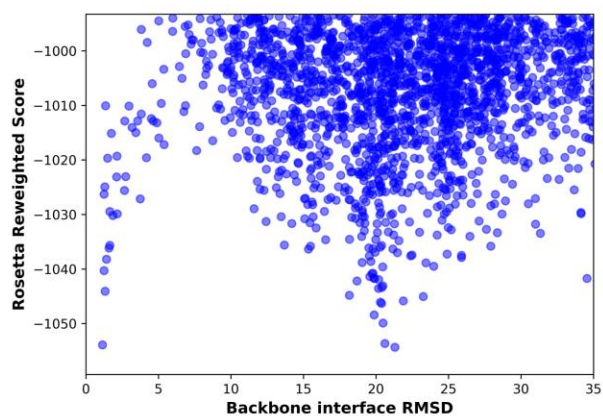

**Fig. S4. A strict template match cutoff still allows to accurately model interactions with receptor conformational changes**

Setting the matching cutoff to 0.5 Å still generates accurate models of the Moesin FERM domain-peptide interaction, despite considerable movement of the receptor upon binding, as shown by the near-native energy funnel in the energy landscape (compare to **Fig. 4B**).

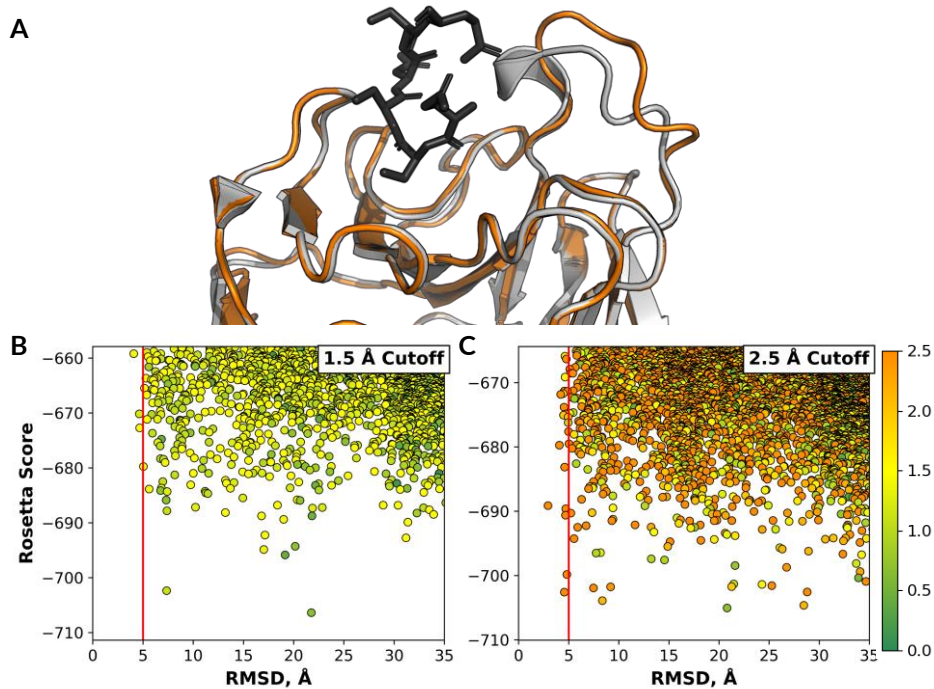

**Fig. S5. Increasing patch matching cutoff to 2.5Å can improve the performance on a challenging target.**

**A.** Comparison of the RanBPM protein bound (orange, PDB ID 5JIU) and unbound (gray, PDB ID: 5JI9) conformations show pronounced conformational change at the loop near the binding site of the peptide (black). **B.-C.** Energy landscapes for simulations with matching cutoffs of 1.5 (B) and 2.5Å (C) respectively. The red line indicates the 5Å RMSD cutoff. The structures are colored according to a green-yellow-orange scale reflecting the source-target patch RMSD (in Å).

**Table S1. PatchMAN performance for docking only the binding motif (for the PFPD subset of with known motif in Table 1).** For all tables, the best model is the top-RMSD model among 10 top-scoring clusters.

| Complex PDB ID | Unbound receptor | Best model, motif only [Å] | Best model full peptide [Å] | Best sampled RMSD [Å] | Peptide length |
|----------------|------------------|----------------------------|-----------------------------|-----------------------|----------------|
| 1CZY           | 1CA4             | 11.1                       | 2.8                         | 1.5                   | 6              |
| 1EG4           | 1EG3             | 7.9                        | 19.6                        | 0.9                   | 4              |
| 1ELW           | 1A17             | 1.5                        | 2.0                         | 0.6                   | 4              |
| 1JD5           | 1JD4             | 1.1                        | 3.7                         | 0.5                   | 4              |
| 1JWG           | 1JWF             | 1.4                        | 1.4                         | 1.4                   | 7              |
| 1MFG           | 2H3L             | 1.1                        | 9.4                         | 1.1                   | 6              |
| 1NTV           | 1P3R             | 1.0                        | 1.2                         | 1.0                   | 8              |
| 1RXZ           | 1RWZ             | 0.8                        | 1.1                         | 0.8                   | 6              |
| 1SSH           | 1OOT             | 7.6                        | 1.3                         | 1.0                   | 6              |
| 1X2R           | 1X2J             | 1.2                        | 0.9                         | 0.6                   | 6              |
| 2A3I           | 2AA2             | 0.8                        | 1.1                         | 0.5                   | 7              |
| 2CCH           | 1H1R             | 3.7                        | 4.9                         | 1.5                   | 5              |

**Table S2. Summary of performance for the LNR subset**

| <b>Complex PDB ID</b> | <b>Unbound receptor</b> | <b>Best model [Å]</b> | <b>Best sampled RMSD [Å]</b> | <b>Peptide length</b> |
|-----------------------|-------------------------|-----------------------|------------------------------|-----------------------|
| 1P7W                  | 1EGQ                    | 4.2                   | 1.9                          | 7                     |
| 1D4T                  | 1D1Z                    | 8.3                   | 5.3                          | 11                    |
| 1KY7                  | 1QTS                    | 15.0                  | 2.9                          | 9                     |
| 1T3L                  | 1T3S                    | 1.4                   | 0.8                          | 17                    |
| 1T5Z                  | 1E3G                    | 1.4                   | 1.2                          | 11                    |
| 1TJ9                  | 2QU9                    | 4.9                   | 1.5                          | 4                     |
| 1XQY                  | 1XQX                    | 2.9                   | 2.1                          | 4                     |
| 2B1N                  | 2B1M                    | 1.4                   | 0.9                          | 5                     |
| 2FIB                  | 3FIB                    | 2.1                   | 1.7                          | 4                     |
| 2ORZ                  | 2ORX                    | 4.1                   | 1.7                          | 3                     |
| 2V8X                  | 5GW6                    | 0.9                   | 0.7                          | 14                    |
| 2WV5                  | 2J92                    | 6.3                   | 1.2                          | 9                     |
| 2Z9I                  | 1Y8T                    | 0.8                   | 0.5                          | 4                     |
| 3AYU                  | 1QIB                    | 2.8                   | 2.5                          | 10                    |
| 3BRH                  | 2QCJ                    | 8.8                   | 1.8                          | 7                     |
| 3C3O                  | 2OEW                    | 4.7                   | 1.2                          | 13                    |
| 3DNJ                  | 3G3P                    | 0.8                   | 0.6                          | 3                     |
| 3N2D                  | 3RL9                    | 9.6                   | 3.4                          | 6                     |
| 3N5U                  | 6G0J                    | 2.9                   | 2.0                          | 7                     |
| 3NIH                  | 3NIL                    | 1.0                   | 0.4                          | 3                     |
| 3R42                  | 3R3Q                    | 13.9                  | 3.2                          | 8                     |
| 3R7G                  | 2YLF                    | 10.2                  | 4.7                          | 19                    |
| 3UFM                  | 2BOO                    | 4.6                   | 1.9                          | 4                     |
| 4BTA                  | 4BT8                    | 3.6                   | 2.1                          | 9                     |
| 4FVD                  | 4FVB                    | 1.9                   | 1.3                          | 4                     |
| 4MVK                  | 6GQZ                    | 2.4                   | 2.1                          | 6                     |
| 4TJX                  | 4TJV                    | 16.7                  | 4.8                          | 3                     |
| 4Z2O                  | 4Z27                    | 1.7                   | 1.1                          | 11                    |
| 5GR9                  | 5JFK                    | 6.3                   | 5.2                          | 12                    |
| 5JIU                  | 5JI9                    | 7.4                   | 3.6                          | 6                     |
| 5N85                  | 4IPG                    | 7.7                   | 3.9                          | 12                    |
| 5ONP                  | 5DLH                    | 21.9                  | 1.6                          | 5                     |
| 5SGA                  | 2SGA                    | 0.3                   | 0.2                          | 4                     |
| 5YC2                  | 5YBX                    | 1.1                   | 0.7                          | 14                    |
| 6CCT                  | 6CCR                    | 4.8                   | 1.8                          | 3                     |
| 6FC6                  | 6FC5                    | 5.3                   | 1.5                          | 3                     |
| 6HGT                  | 2GP5                    | 5.3                   | 2.7                          | 5                     |



|      |      |      |     |    |
|------|------|------|-----|----|
| 6N3E | 6N3F | 1.3  | 1.0 | 7  |
| 6J0X | 6J0V | 15.2 | 5.3 | 16 |

**Table S3. Increasing the RMSD cutoff for patch alignments does not significantly improve results for complexes that include conformational change upon binding**

| <b>Complex PDB ID</b> | <b>Best model [Å]</b> | <b>Rerun with matching cutoff 2.5 Å [Å]</b> |
|-----------------------|-----------------------|---------------------------------------------|
| 2WV5                  | 6.3                   | 16.4                                        |
| 3R7G                  | 10.2                  | 7.2                                         |
| 5JIU                  | 7.4                   | 4.6                                         |
| 5N85                  | 7.7                   | 6.7                                         |

### SI References

1. P. Kursula, I. Kursula, F. Lehmann, Y. H. Song, M. Wilmanns, Crystal structure of the SH3 domain from a *S. cerevisiae* hypothetical 40.4 kDa protein in complex with a peptide. *doi: 10.2210/pdb1ssh/pdb* (2005).
2. P. C. Stolt, *et al.*, Origins of peptide selectivity and phosphoinositide binding revealed by structures of disabled-1 PTB domain complexes. *Structure* 11, 569–579 (2003).
